# Supplementary material
Source: PubMed Central journal article supplement (PMC5641873)
Supplement: 10.1074_M117.800078_jbc.M117.800078-1.pdf [file 10.1074_M117.800078_jbc.M117.800078-1.pdf]

## SUPPLEMENTARY FIGURE LEGENDS

### Figure S1: Structure and Sequence Dependence of XPA DBD Binding of Substrates

(A) Binding of XPA DBD to 8/12 splayed-arm (circle), 8/12 HP splayed-arm with mixed sequence (triangle), and 8/12 HP splayed-arm (square) (substrates 1, 2, and 3 in Figure 1, respectively) as determined by fluorescence anisotropy binding assay. Error bars represent standard deviation from triplicate experiments. (B) Dissociation constants ( $K_d$ ) determined from each curves in panel A.

### Figure S2: Chemical Shift Perturbations (CSPs) Induced by DNA Substrates.

CSPs for each residues observed from the NMR titration of XPA DBD with 8/12 splayed-arm, 8/12 5' overhang, 8/12 3' overhang, and 8/4 3' overhang DNA (substrates 1 without FITC tag, 10, 12, and 13 in Figure 1, respectively). Peaks exchange broadened upon DNA binding are shown as open bars. Only the chemical shifts that were perturbed above the threshold are shown.

### Figure S3: V166A Mutant is Less Stable than WT XPA

(A) Overlay of  $^1\text{H}$  1D NMR spectra of XPA DBD WT (blue) and V166A (red). (B) CD thermal denaturation curves of WT (black) and V166A (gray) XPA DBD. Melting temperatures ( $T_m$ ) were 45.5 °C (WT) and 41.5 °C (V166A).

### Table S1: Backbone Resonance Assignments for XPA DBD

The XPA DBD construct includes N-terminal GPGS sequence from His-tag.

### Table S2: Primer Sequences for XPA DBD Mutant Construction

Figure S1

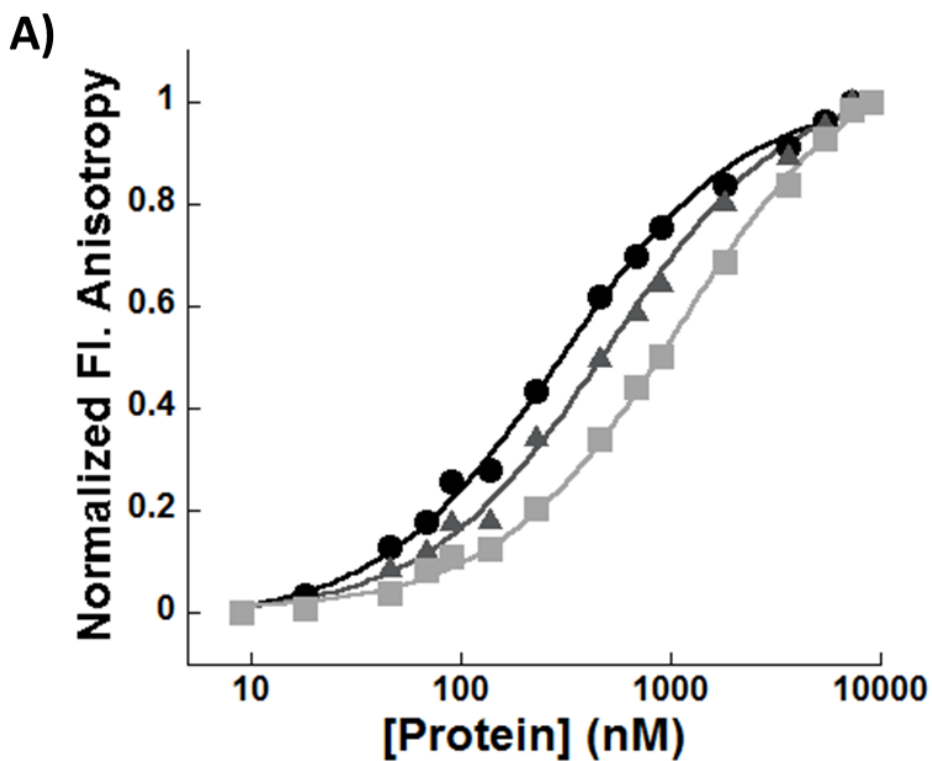

B)

| Substrate | Kd ( $\mu\text{M}$ ) |
|-----------|----------------------|
| 1 (●)     | $0.30 \pm 0.02$      |
| 2 (▲)     | $0.51 \pm 0.04$      |
| 3 (■)     | $1.10 \pm 0.05$      |

Figure S2

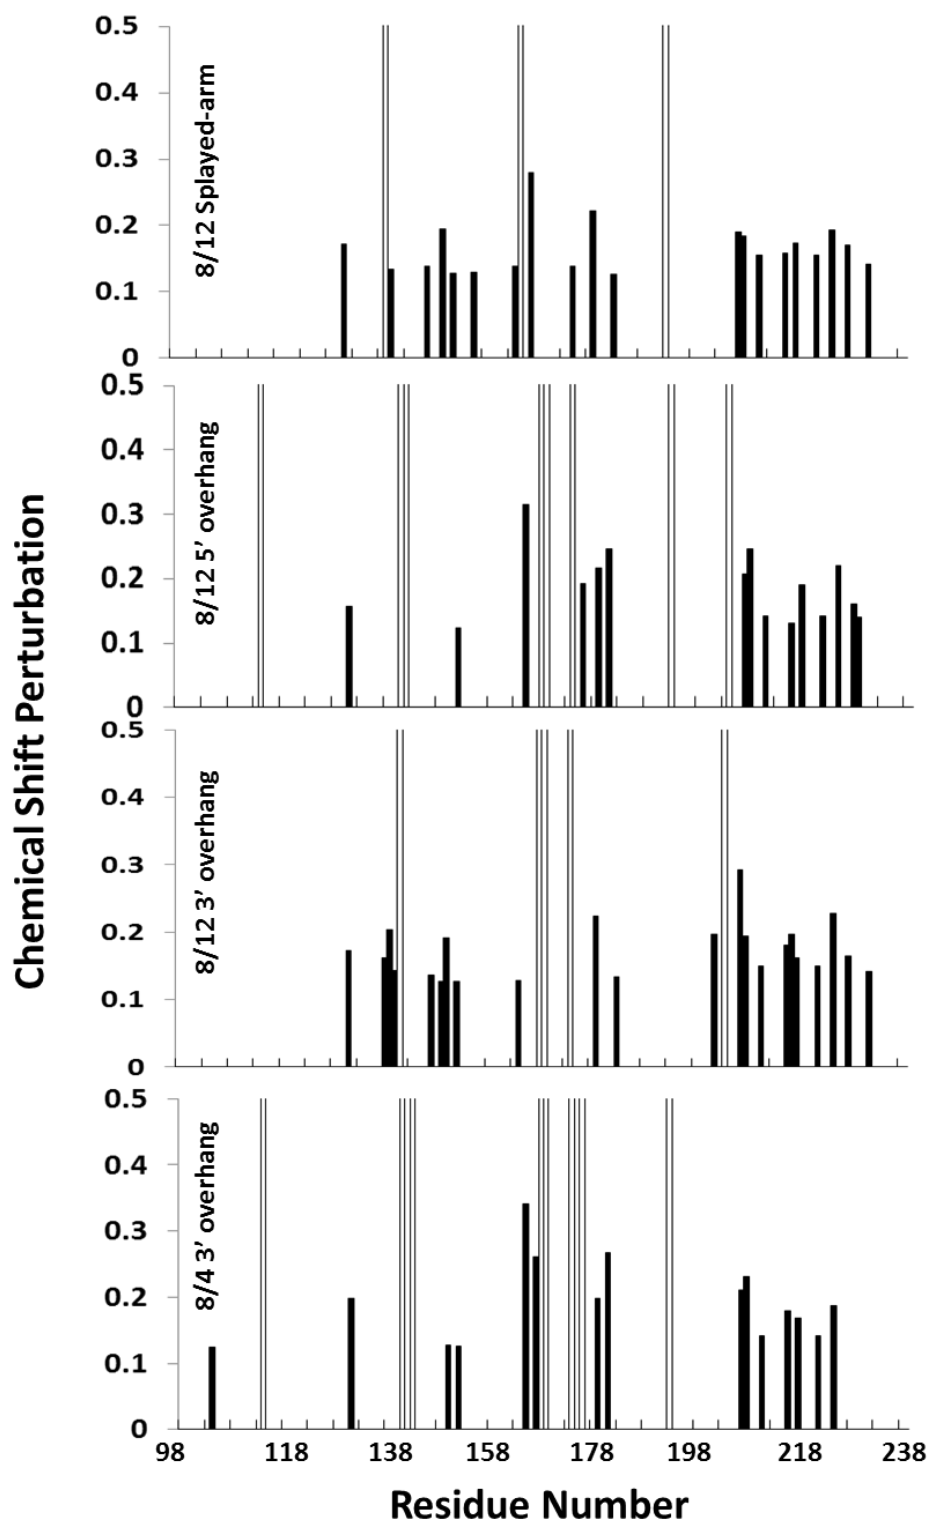

Figure S3

A)

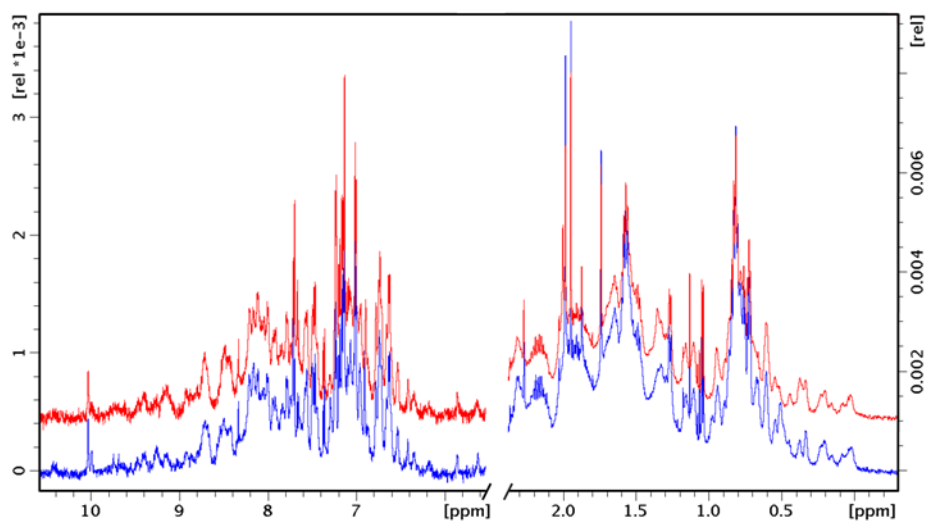

B)

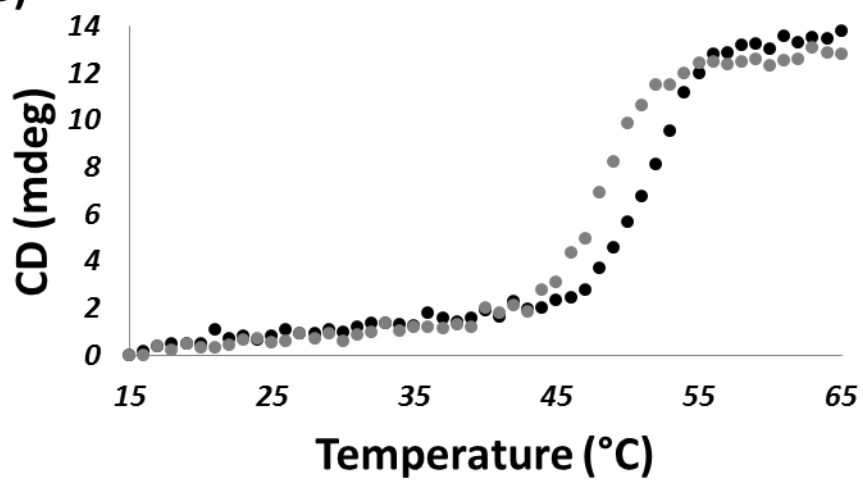

Table S1

| Residue # | Assignment # | Atom | <sup>15</sup> N<br>(ppm) | <sup>1</sup> H<br>(ppm) | CO<br>(ppm) | C <sub>α</sub><br>(ppm) | C <sub>β</sub><br>(ppm) |
|-----------|--------------|------|--------------------------|-------------------------|-------------|-------------------------|-------------------------|
| His-1     | 1            | G    |                          |                         |             |                         |                         |
| His-2     | 2            | P    |                          |                         | 177.527     | 63.515                  | 32.073                  |
| His-3     | 3            | G    | 110.291                  | 8.652                   | 174.258     | 45.285                  |                         |
| His-4     | 4            | S    | 115.584                  | 8.162                   | 174.631     | 58.374                  | 63.753                  |
| 98        | 5            | M    | 121.954                  | 8.419                   | 177.6       | 55.5                    | 32.673                  |
| 99        | 6            | E    | 121.508                  | 8.274                   | 175.65      | 56.671                  | 30.243                  |
| 100       | 7            | F    | 119.388                  | 7.895                   | 174.709     | 55.441                  | 40.05                   |
| 101       | 8            | D    | 121.26                   | 8.203                   | 175.022     | 53.934                  | 41.271                  |
| 102       | 9            | Y    | 118.015                  | 7.683                   | 174.985     | 57.471                  | 39.749                  |
| 103       | 10           | V    | 121.986                  | 8.609                   | 173.652     | 60.501                  | 33.058                  |
| 104       | 11           | I    | 123.33                   | 7.919                   | 175.919     | 58.932                  | 37.709                  |
| 105       | 12           | C    | 128.224                  | 8.854                   | 178.312     | 59.909                  | 30.88                   |
| 106       | 13           | E    | 131.505                  | 9.51                    | 176.128     | 58.342                  | 29.931                  |
| 107       | 14           | E    | 121.174                  | 9.236                   | 177.55      | 57.969                  | 30.687                  |
| 108       | 15           | C    | 117.383                  | 8.388                   | 177.421     | 59.049                  | 32.948                  |
| 109       | 16           | G    | 112.793                  | 8.092                   | 173.548     | 46.314                  |                         |
| 110       | 17           | K    | 122.083                  | 8.62                    | 176.321     | 56.311                  | 33.35                   |
| 111       | 18           | E    | 121.376                  | 8.525                   | 177.049     | 55.899                  | 30.448                  |
| 112       | 19           | F    | 121.057                  | 9.576                   | 172.18      | 56.277                  | 41.501                  |
| 113       | 20           | M    | 118.486                  | 8.819                   | 175.026     | 56.524                  | 34.155                  |
| 114       | 21           | D    | 116.943                  | 8.018                   | 174.776     | 53.333                  | 44.136                  |
| 115       | 22           | S    | 115.757                  | 8.248                   | 172.442     | 56.382                  | 66.346                  |
| 116       | 23           | Y    | 125.942                  | 10.549                  | 178.576     | 62.577                  | 39.506                  |
| 117       | 24           | L    | 118.712                  | 9.235                   | 179.621     | 57.829                  | 40.69                   |
| 118       | 25           | M    | 123.928                  | 8.339                   | 178.733     | 57.921                  | 32.524                  |
| 119       | 26           | N    | 117.912                  | 8.645                   | 177.425     | 56.156                  | 38.36                   |
| 120       | 27           | H    | 110.585                  | 7.698                   | 175.319     | 57.892                  | 29.539                  |
| 121       | 28           | F    | 111.862                  | 7.205                   | 174.34      | 57.17                   | 41.073                  |
| 122       | 29           | D    | 116.425                  | 7.901                   | 174.54      | 55.891                  | 39.4                    |
| 123       | 30           | L    | 123.66                   | 7.745                   |             | 51.589                  | 44.619                  |
| 124       | 31           | P    |                          |                         | 173.514     | 62.546                  | 28.005                  |
| 125       | 32           | T    | 123.292                  | 8.82                    | 174.631     | 61.324                  | 71.856                  |
| 126       | 33           | C    | 135.299                  | 9.797                   | 174.917     | 58.571                  | 30.687                  |
| 127       | 34           | D    | 116.918                  | 8.989                   | 178.12      | 57.246                  | 40.243                  |
| 128       | 35           | N    | 120.702                  | 8.547                   | 176.661     | 56.096                  | 38.921                  |
| 129       | 36           | C    | 121.521                  | 7.759                   | 174.848     | 61.345                  | 30.592                  |
| 130       | 37           | R    | 120.614                  | 6.863                   | 176.714     | 56.698                  | 30.157                  |
| 131       | 38           | D    | 123.469                  | 8.225                   | 176.486     | 51.635                  | 41.368                  |
| 132       | 39           | A    | 126.093                  | 8.903                   | 177.172     | 53.914                  | 18.866                  |

|     |    |   |         |       |         |        |        |
|-----|----|---|---------|-------|---------|--------|--------|
| 133 | 40 | D | 112.937 | 7.763 | 176.313 | 55.27  | 41.972 |
| 134 | 41 | D | 117.241 | 7.143 |         | 55.499 |        |
| 135 | 42 | K |         |       | 178.229 | 60.822 | 32.915 |
| 136 | 43 | H | 113.655 | 8.579 | 173.435 | 55.629 | 29.925 |
| 137 | 44 | K | 117.423 | 6.739 | 176.176 | 56.48  | 33.604 |
| 138 | 45 | L | 122.922 | 8.366 | 176.94  | 53.338 | 43.144 |
| 139 | 46 | I | 118.119 | 9.492 | 174.075 | 58.992 | 42.525 |
| 140 | 47 | T | 115.453 | 8.81  | 175.879 | 61.88  | 71.174 |
| 141 | 48 | K | 121.959 | 8.851 | 177.87  | 60.497 | 33.472 |
| 142 | 49 | T | 112.162 | 7.95  | 176.324 | 66.802 | 68.89  |
| 143 | 50 | E | 122.942 | 7.956 | 178.529 | 59.704 | 29.712 |
| 144 | 51 | A | 121.126 | 8.843 | 179.393 | 55.32  | 18.399 |
| 145 | 52 | K | 114.541 | 8.257 | 176.836 | 60.633 | 32.324 |
| 146 | 53 | Q | 116.53  | 7.944 | 177.964 | 58.605 | 29.472 |
| 147 | 54 | E | 115.589 | 8.801 | 177.323 | 57.512 | 29.823 |
| 148 | 55 | Y | 113.217 | 7.29  | 172.449 | 58.039 | 37.103 |
| 149 | 56 | L | 115.58  | 7.036 | 176.154 | 55.753 | 39.059 |
| 150 | 57 | L | 117.263 | 7.464 | 176.313 | 52.886 | 45     |
| 151 | 58 | K | 121.374 | 9.495 | 178.551 | 54.418 | 35.581 |
| 152 | 59 | D | 122.7   | 8.979 | 179.52  | 59.113 | 39.691 |
| 153 | 60 | C | 115.176 | 8.619 | 176.364 | 60.095 | 26.868 |
| 154 | 61 | D | 123.273 | 7.406 | 176.144 | 57.179 | 42.76  |
| 155 | 62 | L | 116.254 | 7.305 | 177.633 | 56.747 | 42.637 |
| 156 | 63 | E | 113.903 | 8.047 | 179.545 | 57.326 | 32.397 |
| 157 | 64 | K | 116.532 | 7.946 | 176.684 | 56.012 | 33.27  |
| 158 | 65 | R | 120.052 | 6.948 | 174.543 | 56.478 | 30.377 |
| 159 | 66 | E | 122.316 | 8.254 |         | 54.391 | 32.641 |
| 160 | 67 | P |         |       |         |        |        |
| 161 | 68 | P |         |       | 177.481 | 63.018 | 31.932 |
| 162 | 69 | L | 122.373 | 8.215 | 178.059 | 55.205 | 42.375 |
| 163 | 70 | K | 125.279 | 9.724 | 173.94  | 56.206 | 34.386 |
| 164 | 71 | F | 111.656 | 7.041 | 175.617 | 54.773 | 41.21  |
| 165 | 72 | I | 118.013 | 9.231 | 174.925 | 59.47  | 41.572 |
| 166 | 73 | V | 123.285 | 8.522 | 176.014 | 61.5   | 33.284 |
| 167 | 74 | K | 128.395 | 8.913 | 175.156 | 54.789 | 35.306 |
| 168 | 75 | K | 124.706 | 8.54  | 176.332 | 56.026 | 32.611 |
| 169 | 76 | N | 122.673 | 8.88  |         | 51.253 | 39.472 |
| 170 | 77 | P |         |       |         |        |        |
| 171 | 78 | H |         |       |         | 58.09  |        |
| 172 | 79 | H | 120.334 | 8.129 |         |        | 29.188 |
| 173 | 80 | S |         |       | 175.256 | 59.561 | 63.578 |
| 174 | 81 | Q | 121.074 | 8.731 | 176.088 | 56.621 | 28.667 |
| 175 | 82 | W | 119.852 | 7.98  | 176.799 | 56.918 | 29.868 |

|     |     |   |         |       |         |        |        |
|-----|-----|---|---------|-------|---------|--------|--------|
| 176 | 83  | G | 108.66  | 8.252 | 173.663 | 45.483 |        |
| 177 | 84  | D | 120.647 | 8.26  | 176.076 | 54.677 | 41.498 |
| 178 | 85  | M | 120.55  | 8.604 | 174.424 | 54.786 | 34.883 |
| 179 | 86  | K | 123.599 | 8.251 | 174.968 | 56.246 | 34.933 |
| 180 | 87  | L | 122.71  | 9.3   | 175.046 | 53.953 | 44.46  |
| 181 | 88  | Y | 119.886 | 9.291 | 174.999 | 56.535 | 42.713 |
| 182 | 89  | L | 123.099 | 9.387 | 178.243 | 54.662 | 41.362 |
| 183 | 90  | K | 131.865 | 8.778 | 177.686 | 61.795 | 32.065 |
| 184 | 91  | L | 117.448 | 9.398 | 179.859 | 58.741 | 41.936 |
| 185 | 92  | Q | 116.783 | 7.191 | 178.552 | 58.377 | 27.618 |
| 186 | 93  | I | 123.884 | 7.688 | 177.298 | 60.897 | 34.353 |
| 187 | 94  | V | 120.709 | 8.6   | 179.147 | 66.781 | 31.745 |
| 188 | 95  | K | 118.677 | 7.211 | 178.723 | 59.976 | 32.447 |
| 189 | 96  | R | 119.433 | 8.038 | 177.954 | 56.443 | 27.825 |
| 190 | 97  | S | 116.021 | 8.956 | 176.179 | 62.71  | 63.087 |
| 191 | 98  | L | 121.949 | 7.855 | 180.738 | 57.779 | 41.167 |
| 192 | 99  | E | 121.164 | 7.926 | 178.823 | 59.101 | 29.555 |
| 193 | 100 | V | 118.517 | 7.954 | 178.033 | 65.938 | 32.419 |
| 194 | 101 | W | 117.447 | 8.639 | 177.696 | 58.856 | 30.126 |
| 195 | 102 | G | 111.575 | 8.129 | 174.109 | 46.746 |        |
| 196 | 103 | S | 109.937 | 7.539 | 173.65  | 57.178 | 65.566 |
| 197 | 104 | Q | 122.67  | 9.263 | 177.975 | 58.481 | 28.021 |
| 198 | 105 | E | 118.995 | 9.001 | 178.869 | 60.519 | 28.609 |
| 199 | 106 | A | 122.802 | 8.107 | 180.71  | 54.924 | 19.004 |
| 200 | 107 | L | 121.846 | 7.35  | 177.668 | 58.019 | 41.033 |
| 201 | 108 | E | 117.69  | 8.313 | 179.887 | 59.386 | 28.454 |
| 202 | 109 | E | 120.037 | 8.099 | 178.352 | 59.338 | 29.434 |
| 203 | 110 | A | 122.35  | 7.552 | 180.727 | 54.756 | 18.502 |
| 204 | 111 | K | 118.696 | 8.044 | 178.883 | 59.778 | 32.26  |
| 205 | 112 | E | 120.272 | 7.769 | 178.711 | 58.871 | 29.25  |
| 206 | 113 | V | 119.246 | 7.91  | 177.882 | 64.892 | 31.973 |
| 207 | 114 | R | 120.452 | 7.843 | 178.032 | 58.144 | 30.267 |
| 208 | 115 | Q | 120.202 | 8.28  | 178.041 | 58.055 | 29.594 |
| 209 | 116 | E | 120.266 | 8.098 | 176.91  | 57.971 | 32.692 |
| 210 | 117 | N | 122.063 | 8.274 | 176.864 | 54.486 | 41.34  |
| 211 | 118 | R | 121.605 | 8.139 | 175.267 | 56.12  | 30.483 |
| 212 | 119 | E | 118.26  | 7.767 | 175.387 | 55.886 | 29.742 |
| 213 | 120 | K | 117.835 | 8.403 | 176.714 | 58.256 | 32.806 |
| 214 | 121 | M | 121.962 | 8.19  | 177.952 | 57.72  | 32.393 |
| 215 | 122 | K | 119.026 | 8.039 | 177.178 | 56.561 | 32.325 |
| 216 | 123 | Q | 121.021 | 8.008 | 177.234 | 57.384 | 32.599 |
| 217 | 124 | K | 120.081 | 8.134 | 177.296 | 57.584 | 28.659 |
| 218 | 125 | K | 120.778 | 8.377 | 177.809 | 58.182 | 29.555 |

|     |     |   |         |       |         |        |        |
|-----|-----|---|---------|-------|---------|--------|--------|
| 219 | 126 | F | 118.434 | 8.332 | 176.633 | 54.643 | 38.427 |
| 220 | 127 | D | 121.022 | 8.184 | 175.555 | 58.003 | 39.51  |
| 221 | 128 | K | 122.054 | 8.281 | 176.351 | 56.901 | 32.749 |
| 222 | 129 | K | 121.562 | 8.135 | 176.91  | 56.923 | 32.851 |
| 223 | 130 | V | 121.723 | 8.276 | 177.178 | 56.863 | 32.43  |
| 224 | 131 | K | 120.948 | 8.031 | 176.585 | 63.135 | 32.649 |
| 225 | 132 | E | 124.102 | 8.246 | 176.148 | 56.794 | 32.862 |
| 226 | 133 | L | 120.44  | 8.198 | 177.621 | 58.008 | 39.549 |
| 227 | 134 | R | 120.325 | 8.129 | 176.43  | 56.392 | 29.132 |
| 228 | 135 | R | 121.95  | 8.199 | 176.122 | 56.315 | 30.754 |
| 229 | 136 | A | 125.167 | 8.271 | 177.776 | 52.576 | 19.172 |
| 230 | 137 | V | 119.468 | 8.075 | 176.391 | 62.432 | 32.664 |
| 231 | 138 | R | 124.603 | 8.38  | 176.335 | 56.218 | 30.786 |
| 232 | 139 | S | 117.066 | 8.33  | 174.703 | 58.45  | 63.888 |
| 233 | 140 | S | 117.899 | 8.373 | 174.617 | 58.581 | 63.739 |
| 234 | 141 | V | 120.64  | 7.989 | 175.852 | 62.576 | 32.437 |
| 235 | 142 | W | 124.233 | 8.064 | 175.744 | 57.276 | 29.528 |
| 236 | 143 | K | 123.779 | 7.885 | 175.47  | 55.857 | 33.37  |
| 237 | 144 | R | 122.728 | 8.12  | 176.145 | 56.104 | 30.611 |
| 238 | 145 | E | 123.013 | 8.483 | 175.845 | 56.7   | 30.375 |
| 239 | 146 | T | 120.159 | 7.813 |         | 63.196 | 70.675 |



Table S2

| <b>Mutation</b> | <b>Primer</b> | <b>Sequence (5' → 3')</b>                |
|-----------------|---------------|------------------------------------------|
| V166A           | Fwd           | AAATTTATTGcGAAGAAGAATCCACATC             |
|                 | Rev           | AAGAGGTGGCTCTCTTTTTTC                    |
| W175A           | Fwd           | TCATTCACAAGcGGGTGATATGAAACTC             |
|                 | Rev           | TGTGGATTCTTCTTCACAATAAATTTAAG            |
| L191V           | Fwd           | GAAGAGGTCTgTTGAAGTTTGG                   |
|                 | Rev           | ACAATCTGTAACCTTTAAGTAGAG                 |
| R207Q           | Fwd           | AAGGAAGTCCaACAGGAAAACC                   |
|                 | Rev           | TGCTTCTTCTAATGCTTCTTG                    |
| K221E           | Fwd           | GAAATTTGATgAAAAAGTAAAAGAATTGC            |
|                 | Rev           | TTCTGTTTCATTTTTTCTCGG                    |
| K222E           | Fwd           | ATTTGATAAAgAAGTAAAAGAATTGCGG             |
|                 | Rev           | TTCTTCTGTTTCATTTTTTCTCG                  |
| R228E           | Fwd           | AGAATTGCGGgaAGCAGTAAGAAG                 |
|                 | Rev           | TTTACTTTTTTATCAAATTTCTTCTGTTTC           |
| R228X           | Fwd           | GCGGGATCCATGGAATTTGATTATGTAATATGCG       |
|                 | Rev           | TAATTGCGGCCGCTCACCGCAATTCTTTTACTTTTTTATC |
| W235X           | Fwd           | GCGGGATCCATGGAATTTGATTATGTAATATGCG       |
|                 | Rev           | TAATTGCGGCCGCTCACACGCTGCTTCTTACTGC       |
